# Supplementary material for: Entropy based analysis of vertebrate sperm protamines sequences: evidence of potential dityrosine and cysteine-tyrosine cross-linking in sperm protamines
Source: PubMed Central journal article supplement (PMC7126135; doi:10.1186/s12864-020-6681-2), 2020-04-03
Supplement: 12864_2020_6681_MOESM1_ESM.pdf [file 12864_2020_6681_MOESM1_ESM.pdf]

# Entropy Based Analysis of Vertebrate Sperm Protamines Sequences: Evidence of Dityrosine and Cysteine-Tyrosine Cross-Linking in Sperm Protamines

## Supplemental Tables

**Table 1 Highly Conserved Positions in Eutherian P1 Sperm Protamine MSA.**

| Rank | Position in Alignment | Relative Entropy (bit) | Represented Residues                                                                             |
|------|-----------------------|------------------------|--------------------------------------------------------------------------------------------------|
| 1    | 7                     | 6.157                  | C: 98.6%<br>R: 1.4%                                                                              |
| 2    | 49                    | 6.12                   | C: 97.9%<br>G: 1.4%<br>S: 0.7%                                                                   |
| 3    | 50                    | 5.87                   | C: 95.1%<br>R: 2.1%<br>Y: 1.4%<br>G: 0.7%<br>S: 0.7%                                             |
| 4    | 60                    | 5.439                  | C: 89.5%<br>R: 4.9%<br>S: 4.2%<br>Y: 1.4%                                                        |
| 5    | 38                    | 5.187                  | C: 86.9%<br>G: 4.1%<br>Y: 2.8%<br>R: 1.4%<br>S: 1.4%<br>V: 1.4%<br>A: 0.7%<br>F: 0.7%<br>H: 0.7% |
| 6    | 17                    | 4.885                  | C: 79.3%<br>R: 13.1%<br>G: 5.5%<br>S: 1.4%<br>Y: 0.7%                                            |
| 7    | 29                    | 4.813                  | C: 77.2%<br>Y: 13.1%<br>S: 5.5%<br>G: 1.4%<br>R: 1.4%<br>F: 0.7%<br>N: 0.7%                      |
| 8    | 6                     | 4.604                  | C: 95.5%<br>R: 4.5%                                                                              |
| 9    | 37                    | 4.33                   | C: 69.0%<br>S: 19.3%<br>F: 5.5%<br>R: 5.5%<br>T: 0.7%                                            |

**Table 2 Highly Conserved Positions in Processed Eutherian P2 Sperm Protamine MSA.**

| Rank | Position in Alignment | Relative Entropy (bit) | Represented Residues            |
|------|-----------------------|------------------------|---------------------------------|
| 1    | 59                    | 6.381                  | C: 100.0%                       |
| 2    | 75                    | 6.381                  | C: 100.0%                       |
| 3    | 83                    | 6.381                  | C: 100.0%                       |
| 4    | 93                    | 6.381                  | C: 100.0%                       |
| 5    | 107                   | 6.381                  | C: 100.0%                       |
| 6    | 68                    | 5.513                  | H: 100.0%                       |
| 7    | 89                    | 4.721                  | H: 87.5%<br>N: 6.2%<br>P: 6.2%  |
| 8    | 53                    | 4.635                  | H: 87.5%<br>G: 6.2%<br>S: 6.2%  |
| 9    | 85                    | 4.543                  | H: 81.2%<br>Y: 12.5%<br>Q: 6.2% |
| 10   | 110                   | 4.371                  | H: 75.0%<br>Y: 18.8%<br>Q: 6.2% |
| 11   | 54                    | 4.288                  | Y: 56.2%<br>H: 43.8%            |

**Table 3 Highly Conserved Positions in Unprocessed Eutherian P2 Sperm Protamine MSA.**

| Rank | Position in Alignment | Relative Entropy (bit) | Represented Residues            |
|------|-----------------------|------------------------|---------------------------------|
| 1    | 59                    | 6.381                  | C: 100.0%                       |
| 2    | 75                    | 6.381                  | C: 100.0%                       |
| 3    | 83                    | 6.381                  | C: 100.0%                       |
| 4    | 93                    | 6.381                  | C: 100.0%                       |
| 5    | 107                   | 6.381                  | C: 100.0%                       |
| 6    | 14                    | 5.513                  | H: 100.0%                       |
| 7    | 68                    | 5.513                  | H: 100.0%                       |
| 8    | 48                    | 5.126                  | H: 93.8%<br>Q: 6.2%             |
| 9    | 44                    | 5.093                  | Y: 100.0%                       |
| 10   | 4                     | 4.836                  | Y: 93.8%<br>C: 6.2%             |
| 11   | 19                    | 4.725                  | Q: 100.0%                       |
| 12   | 26                    | 4.725                  | Q: 100.0%                       |
| 13   | 34                    | 4.725                  | Q: 100.0%                       |
| 14   | 89                    | 4.721                  | H: 87.5%<br>N: 6.2%<br>P: 6.2%  |
| 15   | 53                    | 4.635                  | H: 87.5%<br>G: 6.2%<br>S: 6.2%  |
| 16   | 85                    | 4.543                  | H: 81.2%<br>Y: 12.5%<br>Q: 6.2% |
| 17   | 110                   | 4.371                  | H: 75.0%<br>Y: 18.8%<br>Q: 6.2% |
| 18   | 54                    | 4.288                  | Y: 56.2%<br>H: 43.8%            |
| 19   | 47                    | 4.171                  | T: 100.0%                       |

**Table 4 Highly Conserved Positions in Metatherian P1 Sperm Protamine MSA.**

| Rank | Position in Alignment | Relative Entropy (bit) | Represented Residues                                 |
|------|-----------------------|------------------------|------------------------------------------------------|
| 1    | 7                     | 4.98                   | H: 92.6%<br>R: 5.3%<br>N: 2.1%                       |
| 2    | 4                     | 4.835                  | Y: 95.8%<br>C: 3.2%<br>S: 1.1%                       |
| 3    | 57                    | 4.733                  | Y: 93.7%<br>C: 4.2%<br>K: 2.1%                       |
| 4    | 16                    | 4.67                   | Y: 94.7%<br>N: 3.2%<br>F: 2.1%                       |
| 5    | 62                    | 4.599                  | Y: 92.6%<br>C: 3.2%<br>P: 2.1%<br>S: 2.1%            |
| 6    | 75                    | 4.565                  | Y: 94.5%<br>C: 3.3%<br>N: 2.2%                       |
| 7    | 34                    | 4.536                  | Y: 91.6%<br>S: 4.2%<br>Q: 2.1%<br>M: 1.1%<br>X: 1.1% |

**Table 5 Fish Protamines**

| Rank | Range   | STD     |
|------|---------|---------|
| 1    | K 0.141 | K 0.027 |
| 2    | H 0.185 | H 0.035 |
| 3    | L 0.222 | L 0.039 |
| 4    | T 0.228 | T 0.041 |
| 5    | A 0.256 | E 0.045 |

**Table 6 Eutherian P1 Sperm Protamines**

| Rank | Range   | STD     |
|------|---------|---------|
| 1    | Q 0.182 | Q 0.034 |
| 2    | K 0.224 | P 0.044 |
| 3    | T 0.224 | T 0.046 |
| 4    | S 0.242 | N 0.046 |
| 5    | N 0.244 | A 0.049 |

**Table 7 Eutherian P2 Sperm Protamines**

| Rank | Range   | STD     |
|------|---------|---------|
| 1    | Q 0.07  | Q 0.017 |
| 2    | L 0.09  | T 0.022 |
| 3    | T 0.09  | L 0.023 |
| 4    | K 0.09  | E 0.024 |
| 5    | C 0.099 | V 0.025 |

**Table 8 Truncated Eutherian P2 Sperm Protamines**

| Rank | Range   | STD     |
|------|---------|---------|
| 1    | Q 0.116 | K 0.035 |
| 2    | K 0.117 | Q 0.037 |
| 3    | T 0.127 | T 0.04  |
| 4    | L 0.145 | L 0.044 |
| 5    | C 0.151 | G 0.045 |

**Table 9 Metatherian Sperm Protamines**

| Rank | Range   | STD     |
|------|---------|---------|
| 1    | K 0.177 | N 0.027 |
| 2    | N 0.179 | K 0.03  |
| 3    | G 0.202 | T 0.035 |
| 4    | A 0.223 | A 0.035 |
| 5    | E 0.235 | Q 0.035 |

|             | 10         | 20        | 30         | 40     |
|-------------|------------|-----------|------------|--------|
| PRTA_ACIST  | -ARRRRRHAS | TKLKR---  | ----RRRRH  | GKSKHK |
| PRT_ORYLA   | ----MRRQAS | LPARRRRVR | RTRVRRRRR  | VGRRRH |
| PRT_PERFV   | --PRRRRHAA | RPVRRRRTR | RSSRVHRRR  | AVRRRR |
| PRTB_MUGCE  | --PRRRRETS | RPIRRRRAR | RAPI-RRRR  | VVRRRR |
| PRT1_SCOSC  | -MPRRRRRAS | RPVRRRRAR | RSTAVRRRR  | VVRRRR |
| PRT2_SCOSC  | -MPRRRRRAS | RPIRRRRAR | RSTAVRRRR  | VVRRRR |
| PRT_DICLA   | --PRRRRQAS | RPVRRRRTR | RSTAERRRR  | VVRRRR |
| PRTY_THUTH  | --PRRRRQAS | RPVRRRRYR | RSTAARRRR  | VVRRRR |
| PRTZ_THUTH  | --PRRRRRSS | RPVRRRRYR | RSTVARRRR  | VVRRRR |
| PRTZ1_SAROR | --PRRRRRSS | RPVRRRRYR | RSTAARRRR  | VVRRRR |
| PRTB_ACIGU  | --ARRRRRSS | RPQRRRR-- | ----RRHGR  | RRRGRR |
| PRTB_ACIST  | --ARRRRRSS | RPQRRRR-- | ----RRHGR  | RRRGRR |
| PRTY1_CLUHA | --ARRRRSSS | RPIRRRRPR | RT---TRRR  | AGRRRR |
| PRTY1_CLUPA | --ARRRRSSS | RPIRRRRPR | RT---TRRR  | AGRRRR |
| PRT1_ESOLU  | -PRRRRASSG | RPVRRRRP- | KMS--RRRR  | GGRRRR |
| PRTZ_CLUPA  | ARRRSRRAS  | RPVRRRRP- | RVS--RRRR- | -ARRRR |
| PRTZ_CLUHA  | ARRRSRRAS  | RPVRRRRP- | RVS--RRRR- | -ARRRR |
| PRT4_ONCMY  | -MPRRRR-AS | RRIRRRRP- | RVS--RRRRG | GRRRRR |
| PRTY2_CLUPA | -PRRTRRAS  | RPVRRRRP- | RVS--RRRR- | -ARRRR |
| PRTY2_CLUHA | -PRRTRRAS  | RPVRRRRP- | RVS--RRRR- | -ARRRR |
| PRT3A_ONCMY | -PRRRRRSSS | RPIRRRRP- | RVS--RRRR- | GGRRRR |
| PRTIB_ONCMY | PRRRRRSSS  | RPIRRRRP- | RVS--RRRR  | GGRRRR |
| PRT1B_ONCMY | -MPRRRR-AS | RRIRRRRP- | RVS--RRRR  | GGRRRR |
| PRT1A_ONCMY | -MPRRRR-AS | RRVRRRRP- | RVS--RRRR  | GGRRRR |
| PRTC3_ONCMY | -MPRRRR-AS | RPVRRRRP- | RVS--RRRR  | GGRRRR |
| PRT2C_ONCMY | -MPRRRRSSR | RPVRRRRP- | RVSR-RRRR  | GGRRRR |
| PRT14_ONCMY | -MPRRRRSSR | PPVRRRRP- | RVSR-RRRR  | GGRRRR |
| PRT2_ONCMY  | --PRRRRSSS | RPVRRRAR- | RVSR-RRRR  | GGRRRR |
| PRT2A_ONCMY | --PRRRRSSS | RPVRRRRA- | RVSR-RRRR  | GGRRRR |
| PRTIA_ONCMY | --PRRRRSSS | RPVRRRRPR | RVSR-RRRR  | GGRRRR |
| PRT1_ONCKE  | -MPRRRRSSS | RPVRRRRP- | RVSR-RRRR  | GGRRRR |
| PRT2B_ONCMY | -MPRRRRSSS | RPVRRRRP- | RVSR-RRRR  | GGRRRR |
| PRT16_ONCMY | -MPRRRRSSS | RPVRRRRA- | RVSR-RRRR  | GRRRRR |
| PRT17_ONCMY | -MPRRRRSSS | RPVRRRRP- | RVSR-RRRR  | GRRRRR |

Supplemental Figure 1. Alignment of fish protamines.

|                  | 10         | 20          | 30          | 40          | 50         | 60               |
|------------------|------------|-------------|-------------|-------------|------------|------------------|
| AOA2K5CXY9_AOTNA | MARHRCCSR  | --SQRSR-R   | --DRQRRR    | -TPRRRSCRR  | --RTA-RRCG | RRR--YKPRC RRN-  |
| HSP1_RHIFE       | MARYSCSRH  | --SRSRSR-R  | ---R-RQR    | -RRRRRSCGR  | --RR--RACY | RRYTVRYRRR RRRR  |
| HSP1_HIPCO       | MARYRCCSRH | --SRSRCR-R  | ---R-RRRSR  | -RRRRRSCGR  | --RR--RAGY | RRY---TVRY RRRR  |
| A8IYA4_ANTAM     | MARYRCCLTH | --SRSRCRPR  | ---RRRRRRCR | -KLRRRRCRR  | -PRR--RVCC | RRY--TAIRC TR--  |
| A8IYA7_9CETA     | MARYRCCLTH | --SRSGCR-R  | ---RRRRRCR  | -RRRRRRCRR  | --RRR-RVCC | RRY--TVVRC TRQ-  |
| HSP1_CAPHI       | MARYRCCLTH | --SRSRCR-R  | ---RRRRRCR  | -RRRRRRCRR  | --RRR-RVCC | RRY--TVVRC TRQ-  |
| HSP1_SHEEP       | MARYRCCLTH | --SRSRCR-R  | ---RRRRRCR  | -RRRRRRCRR  | --RRR-RVCC | RRY--TVVRC TRQ-  |
| A8IYA2_OVIDA     | MARYRCCLTH | --SRSRCR-R  | ---RRRRRCR  | -RRRRRRCRR  | --RRR-RVCC | RRY--TVVRC TRQ-  |
| HSP1_BOVIN       | MARYRCCLTH | --SGSRCR-R  | ---RRRRRCR  | -RRRRRRCRR  | --RRR-RVCC | RRY--TVIRC TRQ-  |
| AOA068B2A1_BOSIN | MARYRCCLTH | --SGSRCR-R  | ---RRRRRCR  | -RRRRRRCRR  | --RRR-RVCC | RRY--TVIRC TRQ-  |
| AOA193KZWO_9CETA | MARYRCCLTH | --SGSRCR-R  | ---RRRRRCR  | -RRRRRRCRR  | --RR-----  | --RR-----        |
| C8C436_PLAMN     | MARNRCCSRQ | --SRSRCR-R  | ---P-KRGR   | -SRRRRRCYQR | --RR--RVCC | RRY--TTIRC ARQ-  |
| A8IYB4_PHYMC     | MARNRCCSRQ | --SRSRCR-R  | ---P-RRRCR  | -SPRRRRYQR  | --RR--RVCC | RRY--TVTRC ARQ-  |
| C8C437_KOGSI     | MARNRCCSRQ | --SRGRCR-R  | ---P-RRRCR  | -SPKRRRYQR  | --RR--RVCC | RRS--ATMRC ASQ-  |
| C8C438_KOGBR     | MARNRCCSRQ | --SRGRCR-R  | ---P-RRRYR  | -SPRRRRYQR  | --RR--RVCC | RRS--TTMRC ASQ-  |
| HSP1_PIG         | MARYRCCSRH | --SRSRCR-P  | ---R-RRRCR  | -RRRRRRCPR  | --RRR-AVCC | RRY--TVIRC RRC-  |
| A8IYC1_POTPR     | MARYRCCSRH | --SRSRCR-P  | ---R-RRRCR  | -RRRRRRCPR  | --RRR-AVCC | RRY--TVIRC RRC-  |
| F7VJK3_FELCA     | MARYRCCSRH | --SRSRCR-R  | ---R-RRRCR  | -RRRRRRCRR  | -PRK--RVCS | RRY--RVGRC RRR-  |
| HSP1_OTOHE       | MARYRCCSR  | --SRSRCR-R  | ---R-RRKY   | -RRRRRRCR   | --RRR-RVCC | RRY--TMVRC RRR-  |
| C8C444_HEXLI     | MARYRCCSRP | --SRSRCR-R  | ---Q-RRRCR  | -RRRRRRCRQ  | --RRR-RVCC | RRY--TMVRC TRQ-  |
| A8IYB9_HIPAM     | MARYRCCSRP | --SRSRCR-R  | ---Q-RRRCR  | -RRRRRRCRQ  | --RRR-RVCC | RRY--TMVRC TRQ-  |
| HSP1_EQUAS       | MARYRCCSRQ | --SGSRCR-R  | ---RRRRRCR  | -RRRRRRCRR  | --RR--VCC  | RRY--TVLRC RRRR  |
| HSP1_HORSE       | MARYRCCSRQ | --SGSRCR-R  | ---RRRRRCR  | -RRRRRRCRR  | --RR--VCC  | RRY--TVLRC RRRR  |
| HSP1_HYPSA       | MARYRRCR-- | --SRSRCR-R  | ---R-RRRCH  | -RRRRRRCRR  | --RRRRRACC | RRY-----RC RRR-  |
| HSP1_NEOBU       | MARYRRCR-- | --SRSRCR-R  | ---R-RRRCH  | -RRRRRRCRR  | --RRRRRACC | RRY-----RC RRR-  |
| HSP1_RHIHA       | MARYRCCSR  | --SRSRCRPR  | ----RRRCR   | -RRRRRRCRR  | --RR--RVCC | RRY--SARC RRRR   |
| HSP1_MURCY       | MARYRCCR-- | --SRSRCR-R  | ---R-RRRCH  | -RRRRRRCRR  | --RRR-RVCC | RRY--TVIRC RRR-  |
| HSP1_PTEPA       | MARYRCCSRP | --SRSRCR-R  | ---R-RRRCR  | -RRRRRRCRR  | --RR--RVCC | RRY--TVRC RRR-   |
| HSP1_DESRO       | MARYRCCSRP | --SRSRCR-R  | ---R-RRRCR  | -RRRRRRCRR  | --RR--RVCC | RRY--TVRC RRR-   |
| HSP1_MONRE       | MARYRCCSRP | --SRSRCR-R  | ---R-RRRCR  | -RRRRRRCRR  | --RR--RVCC | RRY--TVRC RRR-   |
| HSP1_MORME       | MARYRCCSRP | --SRSRCR-R  | ---R-RRRCR  | -RRRRRRCRR  | --RR--RVCC | RRY--TVRC RRR-   |
| HSP1_MYODA       | MARYRCCR-- | --SRSRCR-R  | ---R-RRRCY  | -RRRRRRCRR  | --RRRRRVCC | RRY----SRC RRR-  |
| F7VJK7_MYOLU     | MARYRCCR-- | --SRSRCR-R  | ---R-RRRCY  | -RRRRRRCRR  | --RRRRRVCC | RRY----SRC RRR-  |
| HSP1_GLABE       | MARYRCCR-- | --SRSRCR-R  | ---R-RRRY   | -RRRRRRCRR  | --RRR-RVCC | RRY----VRC RRR-  |
| HSP1_NATST       | MARYRCCSRQ | --SRSRCR-P  | ---R-RRRCR  | -TRRRRRCRR  | --RR--RVCC | RRY--TVVRC RRR-  |
| HSP1_CHIMC       | MARYRCCSRQ | --SRSRCR-R  | ---R-RRRCR  | -TRRRRRCRR  | --RR--RVCC | RRY--TVVRC RRR-  |
| HSP1_EPTFU       | MARYRCCR-- | --SRSRCR-R  | ---R-RRRCY  | -RRRRRRCRR  | --RR--RVCC | RRY--TVIRC RRR-  |
| HSP1_EPTBR       | MARYRCCR-- | --SRSRCR-R  | ---R-RRRCY  | -RRRRRRCRR  | --RR--RVCC | RRY--TVIRC RRR-  |
| HSP1_CORTO       | MARYRCCSRQ | --SRSRCR-R  | ---R-RRRCY  | -RRRRRRCRR  | --RRR-RVCC | RRY----TRY RRR-  |
| HSP1_PLEAU       | MARYRCCSRQ | --SRSRCR-R  | ---R-RRRCY  | -RRRRRRCRR  | --RR--RVCC | RRY--TVVRC RRR-  |
| HSP1_PTEHP       | MARYRCCSRQ | --SRSRCR-R  | ---R-RRRCR  | -RRRRRRCRR  | --RR--RVCC | RRY--TVRC RRRR   |
| F7VJK4_CANLF     | MARYRCCSRQ | --SRSRCR-R  | ---R-RRRCR  | -RRRRRRCRR  | RRR--RVCC  | RRY--TVVRC RRR-  |
| C8C440_EUBGL     | MARNRCCSRQ | --SRSRRCR-R | ---P-RQR    | -SQRRCRR    | --RR--RVCC | RRY--TTVRC ARR-  |
| C8C439_EUBAS     | MARNRCCSRQ | --SRSRRCR-R | ---P-RQR    | -SQRRCRR    | --RR--RVCC | RRY--TTVRC ARR-  |
| B1ACJ7_BALMY     | MARNRCCSRQ | --SRSRRCR-R | ---P-RQR    | -SQRRCRR    | --RR--RVCC | RRY--TTVRC ARR-  |
| B1ACJ8_EUBJA     | MARNRCCSRQ | --SRSRRCR-R | ---P-RQR    | -SQRRCRR    | --RR--RVCC | RRY--TTVRC ARR-  |
| B1ACJ6_CAPMR     | MARNRCCSRQ | --SRSRRCR-R | ---P-RQR    | -SQRRCRR    | --RR--RVCC | RRY--TTVRC ARQ-  |
| B1ACI8_MEGNO     | MARNRCCSRP | --SRSRRCR-R | ---P-RQR    | -SQRRCRR    | --RR--RVCC | RRY--TTVRC ARQ-  |
| B1ACI9_BALPH     | MARNRCCSRP | --SRSRRCR-R | ---P-RQR    | -SQRRCRR    | --RR--RVCC | RRY--TTVRC ARQ-  |
| B1ACJ3_BALBN     | MARNRCCSRP | --SRSRRCR-R | ---P-RQR    | -SQRRCRR    | --RR--RVCC | RRY--TTVRC AGQ-  |
| B1ACJ4_BALAC     | MARNRCCSRP | --SRSRRCR-R | ---P-RQR    | -SQRRCRR    | --RR--RVCC | RRY--TTVRC AGQ-  |
| B1ACJ1_BALBO     | MARNRCCSRP | --SRSRRCR-R | ---P-RQR    | -SQRRCRR    | --RR--RVCC | RRY--TTVRC ARQ-  |
| B1ACJ5_ESCRO     | MARNRCCSRP | --SRSRRCR-R | ---P-RQR    | -SQRRCRR    | --RR--RVCC | RRY--TTVRC ARQ-  |
| B1ACJ2_BALED     | MARNRCCSRP | --SRSRRCR-R | ---P-RQR    | -SQRRCRR    | --RR--RVCC | RRY--TTVRC ARQ-  |
| B1ACJ0_BALMU     | MARNRCCSRP | --SRSRRCR-R | ---P-RQR    | -SQRRCRR    | --RR--RVCC | RRY--TTVRC ARQ-  |
| C8C435_BERBI     | MARNRCCSRQ | --SQRRCR-R  | ---P-RRRN   | -SRRRCRR    | --RR--RVCC | RRY--TAIRC ARQ-  |
| A8IYB7_ZIPCA     | MARNRCCSRQ | --SQRRCR-R  | ---P-RRRY   | -SRRRCRR    | --RR--RVCC | RRY--TAIRC ARQ-  |
| C8C432_MESGR     | MARNRCCSRQ | --SQRRCR-R  | ---P-RRRY   | -SRRRCRR    | --RR--RVCC | RRY--TAIRC ARQ-  |
| C8C434_TASSH     | MARNRCCSRQ | --SQRRCR-R  | ---P-RRRY   | -SRRRCRR    | --RR--RVCC | RRY--TAIRC ARQ-  |
| C8C433_MESBI     | MARNRCCSRQ | --SQRRCR-R  | ---P-RRRY   | -SRRRCRR    | --RR--RVCC | RRY--TAIRC ARQ-  |
| C8C431_MESPE     | MARNRCCSRQ | --SQRRCR-R  | ---P-RRRY   | -SRRRCRR    | --RR--RVCC | RRY--TAIRC ARQ-  |
| HSP1_ORCOR       | MARNR-CRSP | --SQRRCR-R  | ---P-RRRCR  | -RRRCRR     | --QR--RVCC | RRY--TTTRC ARQ-  |
| C8C425_GLOMA     | MARNR-CRSP | --SQRRCR-R  | ---P-RRRY   | -RRRCRR     | --RR--RVCC | RRY--TTTRC ARQ-  |
| C8C426_GRAGR     | MARNR-CRSP | --SQRRCR-R  | ---P-RRRY   | -RRRCRR     | --RR--RVCC | RRY--TTTRC ARQ-  |
| B4VYM8_PSECS     | MARNR-CRSP | --SQRRCR-R  | ---P-RRRY   | -RRRCRR     | --RR--RVCC | RRY--TTTRC ARQ-  |
| C8C424_FERAT     | MARNR-CRSP | --SQRRCR-R  | ---P-RRRY   | -RRRCRR     | --RR--RVCC | RRY--TTTRC ARQ-  |
| F5CBD0_PENEL     | MARNR-CRSP | --SQRRCR-R  | ---P-RRRY   | -RRRCRR     | --RR--RVCC | RRY--TTTRC ARQ-  |
| C8C423_LAGAC     | MARNR-CRSP | --SQRRCR-R  | ---P-RRRCL  | -RRRCRR     | --RR--RVCC | RRY--TTTRC AR--  |
| F5CBC9_CPCPM     | MARNR-CRSP | --SQRRCR-R  | ---P-RRRCR  | -RRRCRR     | --RR--RVCC | RRY--ATTRC ARQ-  |
| F5CBC8_LAGAL     | MARNR-CRSP | --SQRRCR-R  | ---P-RRRCR  | -RRRCRR     | --RR--RVCC | RRY--TTTRC ASQ-  |
| C8C421_TURTR     | MARNR-CRSP | --SQRRCR-R  | ---P-RRRCR  | -RRRCRR     | --RR--RVCC | RRY--TTTRC ARQ-  |
| F5CBC0_TURAD     | MARNR-CRSP | --SQRRCR-R  | ---P-RRRCR  | -RRRCRR     | --RR--RVCC | RRY--TTTRC ARQ-  |
| B4VYN1_STECO     | MARNR-CRSP | --SQRRCR-R  | ---P-RRRCR  | -RRRCRR     | --RR--RVCC | RRY--TTTRC ARQ-  |
| F5CBC1_STELO     | MARNR-CRSP | --SQRRCR-R  | ---P-RRRCR  | -RRRCRR     | --RR--RVCC | RRY--TTTRC AR--  |
| F5CBC5_LAGHO     | MARNR-CRSP | --SQRRCR-R  | ---P-RRRCR  | -RRRCRR     | --RR--RVCC | RRY--TTTRC AR--  |
| F5CBB9_DELCA     | MARNR-CRSP | --SQRRCR-R  | ---P-RRRCR  | -RRRCRR     | --RR--RVCC | RRY--TTTRC AR--  |
| F5CBC3_STEAT     | MARNR-CRSP | --SQRRCR-R  | ---P-RRRCR  | -RRRCRR     | --RR--RVCC | RRY--TTTRC AR--  |
| F5CBC4_SOUC      | MARNR-CRSP | --SQRRCR-R  | ---P-RRRCR  | -RRRCRR     | --RR--RVCC | RRY--TTTRC ARQ-  |
| F5CBD1_9CETA     | MARNR-CRSP | --SQRRCR-R  | ---P-RRRCR  | -RRRCRR     | --RR--RVCC | RRY--TTTRC ARQ-  |
| F5CBC7_LAGOL     | MARNR-CRSP | --SQRRCR-R  | ---P-RRRCR  | -RRRCRR     | --RR--RVCC | RRY--TTTRC AR--  |
| B4VYM9_STEBR     | MARNR-CRSP | --SQRRCR-R  | ---P-RRRCR  | -RRRCRR     | --RR--RVCC | RRY--TTTRC ARQ-  |
| F5CBC2_STEFR     | MARNR-CRSP | --SQRRCR-R  | ---P-RRRCR  | -RRRCRR     | --RR--RVCC | RRY--TTTRC AR--  |
| C8C62_SOTFL      | MARNR-CRSP | --SQRRCR-R  | ---P-RRRCR  | -RRRCRR     | --RR--RVCC | RRY--TTTRC AR--  |
| F5CBC42_LISBO    | MARNR-CRSP | --SQRRCR-R  | ---P-RRRCR  | -RRRCRR     | --RR--RVCC | RRY--TTTRC ARQ-  |
| B4VYN0_DELDE     | MARNR-CRSP | --SQRRCR-R  | ---P-RRRCR  | -RRRCRR     | --RR--RVCC | RRY--TTTRC AR--  |
| C8C428_NEOPH     | MARNR-CRSP | --SQRRCR-C  | ---P-RRRY   | -SKRRRCRR   | --RR--RVCC | RRY--TRRC ARQ-   |
| C8C427_9CETA     | MARNR-CRSP | --SQRRCR-C  | ---P-RRRY   | -SKRRRCRR   | --RR--RVCC | RRY--TRRC ARQ-   |
| B4VYM6_PHOPH     | MARNR-CRSP | --SQRRCR-C  | ---P-RRRY   | -SKRRRCRR   | --RR--RVCC | RRY--TRRC ARQ-   |
| F5CIP3_LIPVE     | MARNR-CRSP | --SQRRCR-R  | ---P-RRRY   | -SKRRRCRR   | --RR--RVCC | RRY--TTMRC AKQ-  |
| C8C430_DELLE     | MARNR-CRSP | --SQRRCR-R  | ---P-RRRY   | -SKRRRCRR   | --RR--RVCC | RRY--TTTRC ARQ-  |
| C8C429_MONMO     | MARNR-CRSP | --SQRRCR-R  | ---P-RRRY   | -SKRRRCRR   | --RR--RVCC | RRY--TTTRC ARQ-  |
| A8IYB2_PONBL     | MARNR-CRSP | --SQRRCR-R  | ---P-RRRY   | -SKRRRCRR   | --RR--RVCC | RRY--TSVRC ARQ-  |
| A8IYA9_INIGE     | MARNR-CRSP | --SQRRCR-R  | ---P-RRRY   | -SKRRRCRR   | --RR--RVCC | RRY--TTVRC ARQ-  |
| F7VJK6_LOXAF     | MARYRCCSR  | --SRSRCSR   | ---R-RRSH   | -RRRRRCRR   | --RRTRCC   | RRR--YSLRR RRY-  |
| HSP1_PONPY       | MARYRCCSR  | --SQRRCR-R  | ---R-RRCH   | -RRRRRCRR   | --RRRAMCC  | RRR--YLRRC RRY-  |
| H2NQ55_PONAB     | MARYRCCSR  | --SQRRCR-R  | ---R-RQR    | -RRRRRCRR   | --RRRAMCC  | RRR--YLRRC RRR-  |
| HSP1_GALVR       | MARYRCCR-- | --SRSRCR-R  | ---R-RRSCR  | -RRRRRCRR   | --RA--RRSC | RRR--YSLRC CRRY- |
| HSP1_SAGIM       | MARYRCCSRQ | --SRSRCY-R  | ---Q-RRRGR  | -RRRRRCRR   | --RA--SRCC | RRR--YKLT CRRY-  |
| AOA2R8PK40_CALJA | MARYRCCSRQ | --SRSRCY-R  | ---Q-RRRGR  | -RRRRRCRR   | --RA--SRCC | RRR--YKLP CRRY-  |
| HSP1_ALOSE       | MARYRCCSR  | --SRSRCSR   | ---Q-RPCR   | -RRRRRCRR   | --RA--SRCC | RRR--YLRRC RRY-  |
| HSP1_SAISS       | MARYRCCSR  | --SRSRCSR   | ---R-RRRCR  | -TRRRRCRR   | --RA--RRCC | RRR--YKLR CRRY-  |
| AOA2K6TB39_SAISS | MARYRCCSR  | --SRSRCSR   | ---R-RRRCR  | -TRRRRCRR   | --RA--RRCC | RRR--YKLR CRRY-  |
| AOA2K5R6E5_CEBCA | MARYRCCSR  | --SRSRCSR   | ---Q-RRRGR  | -RRRRRCRR   | --RA--RRCC | RRR--YLRRC RRY-  |
| HSP1_RABIT       | MARYRCCSRQ | --SRSRCR-R  | ---R-RRRCR  | -RRRRRCRR   | --RRV-RKCC | RRR--YLRRC RRY-  |
| HSP1_CAVPO       | MARYRCCSRP | --SRSRCR-R  | ---R-RRRFY  | -RRRRRCRR   | --RR--RCC  | RRR--YLRRC RRY-  |
| HSP1_COLGU       | MARYRCCSRQ | --SRSRCC-R  | ---Q-RRRGR  | -RRRRRCRR   | --RR--RCC  | RRR--YLRRC RRY-  |
| F7VJK5_ERIEU     | MARYRCCSRQ | --SRSRCC-R  | RRYR-RRRCR  | -RRRRRCRR   | --RRR-ACC  | RRR--Y---- RRY-  |
| C3U1R1_9MURI     | MARYRCCSRK | --SRSRCC-R  | ---R-RRRCR  | -RRRRRCRR   | --RR--RRCC | RRR--YLRRC RRY-  |
| HSP1_MOUSE       | MARYRCCSRK | --SRSRCC-R  | ---R-RRRCR  | -RRRRRCRR   | --RR--RRCC | RRR--YLRRC RRY-  |
| C3U1R5_MUSSP     | MARYRCCSRK | --SRSRCC-R  | ---R-RRRCR  | -RRRRRCRR   | --RR--RRCC | RRR--YLRRC RRY-  |
| C3U1Q6_MUSMB     | MARYRCCSRK | --SRSRCC-R  | ---R-RRRCR  | -RRRRRCRR   | --RR--RRCC | RRR--YLRRC RRY-  |
| C3U1Q9_MOUSE     | MARYRCCSRK | --SRSRCC-R  | ---R-RRRCR  | -RRRRRCRR   | --RR--RRCC | RRR--YLRRC RRY-  |
| C3U1R0_MOUSE     | MARYRCCSRK | --SRSRCC-R  | ---R-RRRCR  | -RRRRRCRR   | --RR--RRCC | RRR--YLRRC RRY-  |
| C3U1Q8_MUSMC     | MARYRCCSRK | --SRSRCC-R  | ---R-RRRCR  | -RRRRRCRR   | --RR--RRCC | RRR--YLRRC RRY-  |
| C3U1R4_MUSSI     | MARYRCCSRK | --SRSRCC-R  | ---R-RRRCR  | -RRRRRCRR   | --RR--RRCC | RRR--YLRRC RRY-  |
| C3U1Q7_MUSCO     | MARYRCCSRK | --SRSRCC-R  | ---R-RRRCR  | -RRRRRCRR   | --RR--RRCC | RRR--YLRRC RRY-  |
| C3U1R3_MUSMA     | MARYRCCSRK | --SRSRCC-R  | ---R-RRRCR  | -RRRRRCRR   | --RR--RRCC | RRR--YLRRC RRY-  |
| C3U1R2_MUSPA     | MARYRCCSRK | --SRSRCC-R  | ---R-RRRCR  | -RRRRRCRR   | --RR--RRCC | RRR--YLRRC RRY-  |
| HSP1_RAT         | MARYRCCSRK | --SRSRCC-R  | ---R-RRRCR  | -RRRRRCRR   | --RR--RRCC | RRR--YLRRC RRY-  |
| C3U1S7_APOSY     | MARYRCCSRK | --SRSRCC-R  | ---R-RRRCR  | -RRRRRCRR   | --RR--RRCC | RRR--YLRRC RRY-  |
| HSP1_NASLA       | MAKSRCCGSQ | --SRSRCC-R  | ---P-RQR    | -RRRRRCRR   | --RRRAMCC  | RRR--YLRRC RRY-  |
| HSP1_TRAJO       | MARYRCCSRQ | --SRSRCC-R  | ---P-RRRCR  | -RRRRRCRR   | --RRRATCC  | RRR--YLRRC RRY-  |
| HSP1_TRAPH       | MARYRCCSRQ | --SRSRCC-R  | ---P-RRRCR  | -RRRRRCRR   | --RRRATCC  | RRR--YLRRC RRY-  |
| LOC34_TRAPH      | MARYRCCSRQ | --SRSRCC-R  | ---P-RRRCR  | -RRRRRCRR   | --RRRATCC  | RRR--YLRRC RRY-  |
| HSP1_TRACR       | MARYRCCSRQ | --SRSRCC-R  | ---P-RRRCR  | -RRRRRCRR   | --RRRATCC  | RRR--YLRRC RRY-  |
| HSP1_TRAOB       | MARYRCCSRQ | --SRSRCC-R  | ---P-RRRCR  | -RRRRRCRR   | --RRRATCC  | RRR--YLRRC RRY-  |
| LOC39_9PRIM      | MARYRCCSRQ | --SRSRCC-R  | ---P-RRRCR  | -RRRRRCRR   | --RRRATCC  | RRR--YLRRC RRY-  |
| LOCNC1_TRAPH     | MARYRCCSRQ | --SRSRCC-R  | ---P-RRRCR  | -RRRRRCRR   | --RRRATCC  | RRR--YLRRC RRY-  |
| HSP1_SEMEN       | MARYRCCSRQ | --SRSRCC-R  | ---P-RRRCR  | -RRRRRCRR   | --RRRATCC  | RRR--YLRRC RRY-  |
| HSP1_TRAVT       | MARYRCCSRQ | --SRSRCC-R  | ---P-RRRCR  | -RRRRRCRR   | --RRRATCC  | RRR--YLRRC RRY-  |
| HSP1_TRAPL       | MARYRCCSRQ | --SRSRCC-R  | ---P-RRRCR  | -RRRRRCRR   | --RRRATCC  | RRR--YLRRC RRY-  |
| HSP1_TRAGE       | MARYRCCSRQ | --SRSRCC-R  | ---P-RRRCR  | -RRRRRCRR   | --RRRATCC  | RRR--YLRRC RRY-  |
| HSP1_TRAFR       | MARYRCCSRQ | --SRSRCC-R  | ---P-RRRCR  | -RRRRRCRR   | --RRRATCC  | RRR--YLRRC RRY-  |
| S4SNK2_9PRIM     | -----RSQ   | --SRSRCC-R  | ---P-RRRCR  | -RRRRRCRR   | --RRRATCC  | RRR--YLRRC RRY-  |
| S4SLN4_9PRIM     | -----RSQ   | --SRSRCC-R  | ---P-RRRCR  | -RRRRRCRR   | --RRRATCC  | RRR--YLRRC RRY-  |
| F7VJK8_OTOGA     | MARYRCCSRQ | --SRSRCC-R  | ---R-RRRCR  | -RRRRRCRR   | --RR--RRCC | RRR--YLRRC RRY-  |
| HSP1_PILBA       | MARYRCCSRQ | --SRSRCC-R  | ---R-RRRCR  | -RRRRRCRR   | --RR--RRCC | RRR--YLRRC RRY-  |
| HSP1_MACMU       | MARYRCCSRQ | --SRSRCC-R  | ---R-RRRCR  | -RRRRRCRR   | --RR--RRCC | RRR--YLRRC RRY-  |
| HSP1_PAPCY       | MARYRCCSRQ | --SRSRCC-R  | ---R-RRRCR  | -RRRRRCRR   | --RR--RRCC | RRR--YLRRC RRY-  |
| AOA096MLL5_PAPAN | MARYRCCSRQ | --SRSRCC-R  | ---Q-RRRGR  | -RRRRRCRR   | --RRRAMCC  | RRR--YLRRC RRY-  |
| HSP1_HYLLA       | MARYRCCSRQ | --SRSRCC-R  | ---R-RRRCR  | -RRRRRCRR   | --RRRAMCC  | RRR--YLRRC RRY-  |
| HSP1_HUMAN       | MARYRCCSRQ | --SRSRCC-R  | ---Q-RQR    | -RRRRRCRR   | --RRRAMCC  | RRR--YLRRC RRY-  |
| HSP1_GORG        | MARYRCCSRQ | --SRSRCC-R  | ---Q-RQR    | -RRRRRCRR   | --RRRAMCC  | RRR--YLRRC RRY-  |
| HSP1_PANTR       | MARYRCCSRQ | --SRSRCC-R  | ---Q-RQR    | -RRRRRCRR   | --RRRAMCC  | RRR--YLRRC RRY-  |
| HSP1_PANPA       | MARYRCCSRQ | --SRSRCC-R  | ---Q-RQR    | -RRRRRCRR   | --RRRAMCC  | RRR--YLRRC RRY-  |

Supplemental Figure 2. Alignment of Eutherian P1 type sperm protamines.

|            | 10          | 20          | 30         | 40         | 50         | 60         |
|------------|-------------|-------------|------------|------------|------------|------------|
| PRM2_RATTU | MVRYRMRSPS  | ESP HQGPGQD | HESEEQG--- | -QGQELNPER | VEDYGRTHRG | --HHRHRRCS |
| PRM2_MOUSE | MVRYRMRSPS  | EGPHQGPGQD  | HEREEQG--- | -QGQGLSPER | VEDYGRTHRG | HHHHRHRRCS |
| PRM2_RATFU | MVRYRMRSPS  | EGPHQGPGQD  | HEREEQG--- | -QGQELSPER | VEDYGRTHRG | --HHRHRRCS |
| PRM2_ALOSE | MVRYHVRSPS  | ERPHEEYRQL  | VNGQEQGRHG | QEEQGMSAEG | VEGYGRTHQG | CYGYRRRLCS |
| PRM2_CALJA | MVRYRVRSPS  | ERPHEEYRQL  | VNWQEQGRNG | QEEQGLSAEG | GEVYGRTHQG | YSSYRRRRCS |
| PRM2_SEMEN | MVRYRMRSLs  | ERPHEVHGQQ  | VYGQEQGHNG | QEEQGLSPEH | VEVYERTHQG | YSHHRRRRCS |
| PRM2_ERYPA | MVRYRTRSLs  | ERPHEVHGQQ  | VHGQDQGHNG | QEEQGLSPEH | VEVYERTHQG | HSHHRRRRCS |
| PRM2_MACNE | MVRYRMRSLs  | ERPHEVHGQQ  | VHGQDQGHNG | QEEQGLNPEH | VEVYERTHRG | HSHHRRRRCS |
| PRM2_MACFU | MVRYRMRSLs  | ERPHEVHGQQ  | VHGQDQGHNG | QEEQGLNPEH | VEVYERTHRG | HSHHRRRRCS |
| PRM2_MACMU | MVRYRMRSLs  | ERPHEVHGQQ  | VHGQDQGHNG | QEEQGLNPEH | VEVYERTH-G | HSHYRRRHCS |
| PRM2_GORGO | MVRCRVRSPS  | ERSHEVYRQQ  | LHGQEQGHHG | QEEQGLSPEH | VEVYERTH-G | HSHYRRRHCS |
| PRM2_PANPA | MVRYRVRSPS  | EPSHEVYRQQ  | LHGQEQGHHG | QEEQGLSPEH | VEVYERTH-G | HSHYRRRHCS |
| PRM2_PANTR | MVRYRVRSPS  | EPSHEVYRQQ  | LHGQEQGHHG | QEEQGLSPEH | VEVYERTH-G | HSHYRRRHCS |
| PRM2_HUMAN | MVRYRVRSLs  | ERSHEVYRQQ  | LHGQEQGHHG | QEEQGLSPEH | VEVYERTH-G | QSHYRRRHCS |
| PRM2_PONPY | MVRYCVRSLs  | ERSHEVYGQQ  | LHGQEQGHHD | QEEQGLSPEQ | VEVYERTQ-G | HSHYRRRHCS |
| PRM2_HYLLA | MVRYCVRSLs  | ERSHEVYGQQ  | LRGQEQGHHG | QEEQGLSPED | VEVYERTH-G | HSHYRRRHCS |
|            | 70          | 80          | 90         | 100        | 110        | 120        |
| PRM2_RATTU | RKRLHRIHKR  | R-RSCRRRRR  | HSCCHRRRRH | RGCRRSRRRR | RCRCRKCRRH | CH         |
| PRM2_MOUSE | RKRLHRIHKR  | R-RSCRRRRR  | HSCCHRRRRH | RGCRRSRRRR | RCRCRKCRRH | HH         |
| PRM2_RATFU | RKRLHRIHKR  | R-RSCRRRRR  | HSCCHRRRRH | RGCRRSRRRR | RCKCRKCRRH | CH         |
| PRM2_ALOSE | RRRLYRVHRR  | RRSFCRRRC-  | --CRYRRRR  | RGCRTRRRRT | -----CRRH  | --         |
| PRM2_CALJA | RRRLYRVHRR  | RRSFCRRRRR  | RSCRYRRRPR | RGCRSRRRRR | -----CRRY  | --         |
| PRM2_SEMEN | RRRLYRIVHRR | RHRSCRRRRR  | RSCRHRRRRH | RGCRTRRRR  | -----CRRY  | --         |
| PRM2_ERYPA | QRRLHRIHRR  | RHRSCRRRRR  | RSCRHRRRRH | RGCRTRRRR  | -----CRRY  | --         |
| PRM2_MACNE | RRRLHRIHRR  | RHRSCRRRRR  | RSCRHRRRRH | RGCRTRRRR  | -----CRRH  | --         |
| PRM2_MACFU | RRRLHRIHRR  | RHRSCRRRRR  | RSCRHRRRRH | RGCRTRRRR  | -----CRRH  | --         |
| PRM2_MACMU | RRRLHRIHRR  | RHRSCRRRRR  | RSCRHRRRRH | RGCRTRRRR  | -----CRRH  | --         |
| PRM2_GORGO | RRRLRRIHRQ  | QHRSCRRRKR  | RSCRHRRRRH | KGCRTRRRRT | -----CRRH  | --         |
| PRM2_PANPA | RRRLRRIHRQ  | QHRSCRRRKR  | RSCRHRRRRH | RGCRTRRRRT | -----CRKH  | --         |
| PRM2_PANTR | RRRLRRIHRQ  | QHRSCRRRKR  | RSCRHRRKHR | RGCRTRRRRT | -----CRRH  | --         |
| PRM2_HUMAN | RRRLHRIHRR  | QHRSCRRRKR  | RSCRHRRRRH | RGCRTRRRRT | -----CRRH  | --         |
| PRM2_PONPY | RRRLHRIHRQ  | QHRSCKRRRR  | HSCRHRRKHR | RGCRTRRRRT | -----CRRH  | --         |
| PRM2_HYLLA | RRRLHRIHRQ  | QHRSCGRRRR  | RSCRQRRRHR | RGCRTRRRR  | -----CRRH  | --         |

Supplemental Figure 3. Alignment of Eutherian P2 type sperm protamines.

|             | 10         | 20          | 30         | 40         | 50         | 60           |
|-------------|------------|-------------|------------|------------|------------|--------------|
| HSP1_PERGU  | MASYR-NSRS | RSRSRF-RRR  | RRGRSRVRGR | DARQGRSSR- | RRRRGKGR-- | --AHSGKKGKGR |
| HSP1_ISOMA  | MASYR-NSRS | RSRSRF-RRR  | RGRRSRVRGR | DARQGRSSR- | RRRRGKGR-- | --AHSGKKGKGR |
| HSP1_MONDO  | MARYRRRSRS | RSRSRYGRRR  | RRSRS----R | RRRSRRRRR- | ---RRGRR-- | ---GRGYHRR   |
| HSP1_DIDVI  | MARYRRRSRS | RSRSRYGRRR  | RRSRS----R | RRRSRRRRR- | ---RRGRR-- | ---GRGYHRR   |
| HSP1_DROGL  | MVRYRRHSRS | RSRSRY-RRR  | RRRR--LRNR | RRYRRSRRG  | RRRRRRGS-- | ---RRGYSTR   |
| HSP1_NOTTY  | MARYR-HSRS | RSRSRY-RRR  | RRRRSRYRSQ | RRYRRHRRS  | GRRRRRGR-- | ---RRGY-RR   |
| HSP1_PHACI  | MARYR-HSRS | RSRSRY-QRR  | RRRRSRYRSQ | RRYRRRRGS  | RRRRRRGR-- | ---RRGY-RR   |
| HSP1_HYPMS  | MARYR-HSRS | RSRSRY-RRR  | RRRRSRYRGR | RRYRRSRR-  | RRRRRRGR-- | ---RRGYRRR   |
| HSP1_LAGHI  | MARYR-HSRS | RSRSRY-RRQ  | RRRRSRYRSR | RRYRRR-Q-  | -RRSRGR--  | ---RRGYSTR   |
| HSP1_DENDO  | MARYR-HSRS | RXRSRY-RRR  | RRXRSRYRSX | RRYRGRRR-  | RRSRGR--   | ---RRGYSTR   |
| HSP1_AEPRU  | MARYR-HSRS | RSRSRY-RRR  | RRRRSRYRSR | RRYRGRRR-  | RRSRGR--   | ---RRGYSTR   |
| HSP1_PSECU  | MARYR-HSRS | RSRSRYRRRR  | RRRRSRYRGR | RRYRRSRR-  | RRRRRRGR-- | CLGRRGYRRR   |
| HSP1_TRIVU  | MARYR-HSRS | RSRSRYRRRR  | RRRRSRYRSR | RRYRRSRR-  | -RRRRGR--  | ---RRGYSTR   |
| HSP1_CAEFU  | MARYR-HSRS | RSRSRYRRRR  | RRRRSRYRSR | RRYRRSRR-  | -RRRRGR--  | ---RRGYSTR   |
| HSP1_POTLO  | MARYR-HSRS | RSRXRY-RRR  | RRRRSRYRSR | RRYRGRRR-  | RRSRGR--   | ---RRGYSTR   |
| HSP1_LAGFA  | MARYR-HSRS | RSRSRY-RRR  | RRRRSRYRSR | RRYRGRRR-  | RRSRGR--   | ---RRGYSTR   |
| HSP1_BETPE  | MARYR-HSRS | RSRSRY-RRR  | RRRRSRYRSR | RRYRGRRR-  | RRSRGR--   | ---RRGYSTR   |
| HSP1_ONCFR  | MARYR-HSRS | RSRSRY-RRR  | RRRRSRYRSR | RRYRGRRR-  | RRSRGR--   | ---RRGYSTR   |
| HSP1_MACRU  | MARYR-HSRS | RSRSRY-RRR  | RRRRSRYRSQ | RRYRGRRR-  | -RRSRGR--  | ---RRGYSTR   |
| HSP1_PETCN  | MARYR-HSRS | RSRSRY-RRR  | RRRRSRYRSR | RRYRGRRR-  | RRSRGR--   | ---RRGYSTR   |
| HSP1_MACPA  | MARYR-HSRS | RSRSRY-RRR  | RRRRSRYRSR | RRYRGRRR-  | -RRSRGR--  | ---RRGYSTR   |
| HSP1_MACEU  | MARYR-HSRS | RSRSRY-RRR  | RRRRSRYRSR | RRYRGRRR-  | RRSRGR--   | ---RRGYSTR   |
| HSP1_MACAG  | MARYR-HSRS | RSRSRY-RRR  | RRRRSRYRSR | RRYRGRRR-  | -RRSRGR--  | ---RRGYSTR   |
| HSP1_DORVA  | MARYR-HSRS | RSRSRY-RRR  | RRRRSRYRSR | RRYRGRRR-  | RRSRGR--   | ---RRGYSTR   |
| HSP1_PETXA  | MARYR-HSXS | RSRSRY-RRR  | RRRRSRYRSR | RRYRGRRR-  | RRSRGR--   | ---RRGYSTR   |
| HSP1_THYST  | MARYR-HSRS | RSRSRY-RRR  | RRRRSRYRSR | RRYRGRRR-  | RRSRGR--   | ---RRGYSTR   |
| HSP1_MACGI  | MARYR-HSRS | RSRSRY-RRR  | RRRRSRYRSR | RRYRGRRR-  | RRSRGR--   | ---RRGYSTR   |
| HSP1_DORMU  | MARYR-HSRS | RSRSRY-RRR  | RRRRSRYRSR | RRYRGRRR-  | RRSRGR--   | ---RRGYSTR   |
| HSP1_WALBI  | MARYR-HSRS | RSRSRY-RRR  | RRRRSRYRSR | RRYRGRRR-  | RRSRGR--   | ---RRGYSTR   |
| HSP1_MACRG  | MARYR-HSRS | RSRSRY-RRR  | RRRRSRYRSR | RRYRGRRR-  | RRSRGR--   | ---RRGYSTR   |
| HSP1_ONYUN  | MARYR-HSRS | RSRSRY-RRR  | RRRRSRYRSR | RRYRGRRR-  | -RRSRGR--  | ---RRGYSTR   |
| HSP1_DENGO  | MARYR-HSRS | RSRSRY-RRR  | RRRRSRYRSR | RRYRGRRR-  | -RRSRGR--  | ---RRGYSTR   |
| HSP1_SETBR  | MARYR-HSRS | RSRSRY-RRR  | RRRRSRYRSR | RRYRGRRR-  | -RRSRGR--  | ---RRGYSTR   |
| HSP1_DASHA  | MARYRRRSRS | RSRSRY-RRR  | RRRRSRGR-R | RRYRRSRR-  | HSRRRRGR-- | ---RRGYSTR   |
| HSP1_SARHA  | MARYRRRSRS | RSRSRY-RRR  | RRRRSRGR-R | RRYRRSRR-  | HSRRRRGR-- | ---RRGYSTR   |
| HSP1_DASMA  | MARYRRRSRS | RSRSRY-RRR  | RRRRSRGR-R | RRYRRSRR-  | HSRRRRGR-- | ---RRGYSTR   |
| HSP1_DASSP  | MARYRRHSRS | RSRSRY-RRR  | RRRRSRGR-R | RRYRRSRR-  | HSRRRRGR-- | ---RRGYSTR   |
| HSP1_NEOLO  | MARYRRHSRS | RSRSRY-RRR  | RRRRSRGR-R | RRYRRSRR-  | HSRRRRGR-- | ---RRGYSTR   |
| HSP1_DASVI  | MARYRRHSRS | RSRSRY-RRR  | RRRRSRGR-R | RRYRRSRR-  | HSRRRRGR-- | ---RRGYSTR   |
| HSP1_PHADO  | MARYRRHSRS | RSRSRY-RRR  | RRRRSRGR-R | RRYRRSRR-  | HSRRRRGR-- | ---RRGYSTR   |
| HSP1_DASAL  | MARYRRHSRS | RSRSRY-RRR  | RRRRSRGR-R | RRYRRSRR-  | HSRRRRGR-- | ---RRGYSTR   |
| HSP1_DASGE  | MARYRRHSRS | RSRSRY-RRR  | RRRRSRGR-R | RRYRRSRR-  | HSRRRRGR-- | ---RRGYSTR   |
| HSP1_DASRO  | MARYRRHSRS | RSRSRY-RRR  | RRRRSRHNR  | RRYRRSRR-  | HSRRRRGR-- | ---RRGYSTR   |
| HSP1_PSEBA  | MARYRRHSRS | RSRSRY-RRR  | RRRRSRHNR  | RRYRRSRR-  | HSRRRRGR-- | ---RRGYSTR   |
| HSP1_PARAP  | MARYRRHSRS | RSRSRY-RRR  | RRRRSRHNR  | RRYRRSRR-  | HSRRRRGR-- | ---RRGYSTR   |
| HSP1_PSENI  | MARYRRHSRS | RSRSRY-RRR  | RRRRSRHNR  | RRYRRSRR-  | HSRRRRGR-- | ---RRGYSTR   |
| HSP1_DASBY  | MARYRRHSRS | RSRSRY-RRR  | RRRRSRHNR  | RRYRRSRR-  | HSRRRRGR-- | ---RRGYSTR   |
| HSP1_MYOME  | MARYRRHSRS | RSRSRY-RRR  | RRRRSRHNR  | RRYRRSRR-  | HSRRRRGR-- | ---RRGYSTR   |
| HSP1_MYOWA  | MARYRRHSRS | RSRSRY-RRR  | RRRRSRHNR  | RRYRRSRR-  | HSRRRRGR-- | ---RRGYSTR   |
| HSP1_PSEMD  | MARYRRHSRS | RSRSRY-RRR  | RRRRSRHNR  | RRYRRSRR-  | HSRRRRGR-- | ---RRGYSTR   |
| HSP1_PSEWO  | MARYRRHSRS | RSRSRY-RRR  | RRRRSRHNR  | RRYRRSRR-  | HSRRRRGR-- | ---RRGYSTR   |
| HSP1_SMIGR  | MARYRRHSRS | RSRSRY-RRR  | RRRRSRHNR  | RRYRRSRR-  | HSRRRRGR-- | ---RRGYSTR   |
| HSP1_SMIBI  | MARYRRHSRS | RSRSRY-RRR  | RRRRSRHNR  | RRYRRSRR-  | HSRRRRGR-- | ---RRGYSTR   |
| HSP1_SMILO  | MARYRRHSRS | RSRSRY-RRR  | RRRRSRHNR  | RRYRRSRR-  | HSRRRRGR-- | ---RRGYSTR   |
| HSP1_ANTFL  | MARYRRHSRS | RSRSRY-RRR  | RRRRSRHNR  | RRYRRSRR-  | HSRRRRGR-- | ---RRGYSTR   |
| HSP1_NINTI  | MARYRRHSRS | RSRSRY-RRR  | RRRRSRHNR  | RRYRRSRR-  | HSRRRRGR-- | ---RRGYSTR   |
| HSP1_NINYV  | MARYRRHSRS | RSRSRY-RRR  | RRRRSRHNR  | RRYRRSRR-  | HSRRRRGR-- | ---RRGYSTR   |
| HSP1_PARRT  | MARYRRHSRS | RSRSRY-RRR  | RRRRSRHNR  | RRYRRSRR-  | HSRRRRGR-- | ---RRGYSTR   |
| HSP1_SMILE  | MARYRRHSRS | RSRSRY-RRR  | RRRRSRHNR  | RRYRRSRR-  | HSRRRRGR-- | ---RRGYSTR   |
| HSP1_PHATA  | MARYRRHSRS | RSRSRY-RRR  | RRRRSRHNR  | RRYRRSRR-  | HSRRRRGR-- | ---RRGYSTR   |
| HSP1_SMIPS  | MARYRRHSRS | RSRSRY-RRR  | RRRRSRHNR  | RRYRRSRR-  | HSRRRRGR-- | ---RRGYSTR   |
| HSP1_ANTBE  | MARYRRHSRS | RSRSRY-RRR  | RRRRSRHNR  | RRYRRSRR-  | HSRRRRGR-- | ---RRGYSTR   |
| HSP1_MICHA  | MARYRRHSRS | RSRSRY-RRR  | RRRRSRHNR  | RRYRRSRR-  | HSRRRRGR-- | ---RRGYSTR   |
| HSP1_ANTGO  | MARYRRHSRS | RSRSRY-RRR  | RRRRSRHNR  | RRYRRSRR-  | HSRRRRGR-- | ---RRGYSTR   |
| HSP1_ANTMI  | MARYRRHSRS | RSRSRY-RRR  | RRRRSRHNR  | RRYRRSRR-  | HSRRRRGR-- | ---RRGYSTR   |
| HSP1_ANTNA  | MARYRRHSRS | RSRSRY-RRR  | RRRRSRHNR  | RRYRRSRR-  | HSRRRRGR-- | ---RRGYSTR   |
| HSP1_ANTSW  | MARYRRHSRS | RSRSRY-RRR  | RRRRSRHNR  | RRYRRSRR-  | HSRRRRGR-- | ---RRGYSTR   |
| HSP1_MURME  | MARYRRHSRS | RSRSRY-RRR  | RRRRSRHNR  | RRYRRSRR-  | HSRRRRGR-- | ---RRGYSTR   |
| HSP1_SMIDO  | MARYRRHSRS | RSRSRY-RRR  | RRRRSRHNR  | RRYRRSRR-  | HSRRRRGR-- | ---RRGYSTR   |
| HSP1_SMIHI  | MARYRRHSRS | RSRSRY-RRR  | RRRRSRHNR  | RRYRRSRR-  | HSRRRRGR-- | ---RRGYSTR   |
| HSP1_SMIMA  | MARYRRHSRS | RSRSRY-RRR  | RRRRSRHNR  | RRYRRSRR-  | HSRRRRGR-- | ---RRGYSTR   |
| HSP1_SMIOO  | MARYRRHSRS | RSRSRY-RRR  | RRRRSRHNR  | RRYRRSRR-  | HSRRRRGR-- | ---RRGYSTR   |
| HSP1_SMIYO  | MARYRRHSRS | RSRSRY-RRR  | RRRRSRHNR  | RRYRRSRR-  | HSRRRRGR-- | ---RRGYSTR   |
| HSP1_PLAMM  | MARYRRHSRS | RSRSRY-RRR  | RRRRSRHNR  | RRYRRSRR-  | HSRRRRGR-- | ---RRGYSTR   |
| HSP1_SMIAR  | MARYRRHSRS | RSRSRY-RRR  | RRRRSRHNR  | RRYRRSRR-  | HSRRRRGR-- | ---RRGYSTR   |
| HSP1_DASCR  | MARYRRHSRS | RSRSRY-RRR  | RRRRSRHNR  | RRYRRSRR-  | HSRRRRGR-- | ---RRGYSTR   |
| HSP1_ANTLE  | MARYRRHSRS | RSRSRY-RRR  | RRRRSRHNR  | RRYRRSRR-  | HSRRRRGR-- | ---RRGYSTR   |
| HSP1_ANTST  | MARYRRHSRS | RSRSRY-RRR  | RRRRSRHNR  | RRYRRSRR-  | HSRRRRGR-- | ---RRGYSTR   |
| HSP1_MURLO  | MARYRRHSRS | RSRSRY-RRR  | RRRRSRHNR  | RRYRRSRR-  | HSRRRRGR-- | ---RRGYSTR   |
| HSP1_MYRFA  | MARYRRHSRS | RSRSRY-RRR  | RRRRSRHNR  | RRYRRSRR-  | HSRRRRGR-- | ---RRGYSTR   |
| HSP1_NINRI  | MARYRRHSRS | RSRSRY-RRR  | RRRRSRHNR  | RRYRRSRR-  | HSRRRRGR-- | ---RRGYSTR   |
| HSP1_SMIGA  | MARYRRHSRS | RSRSRY-RRR  | RRRRSRHNR  | RRYRRSRR-  | HSRRRRGR-- | ---RRGYSTR   |
| HSP1_SMIGI  | MARYRRHSRS | RSRSRY-RRR  | RRRRSRHNR  | RRYRRSRR-  | HSRRRRGR-- | ---RRGYSTR   |
| HSP1_PHACL  | MARYRRHSRS | RSRSRY-RRR  | RRRRSRHNR  | RRYRRSRR-  | HSRRRRGR-- | ---RRGYSTR   |
| HSP1_SMI MU | MARYRRHSRS | RSRSRY-RRR  | RRRRSRHNR  | RRYRRSRR-  | HSRRRRGR-- | ---RRGYSTR   |
| HSP1_SMI VI | MARYRRHSRS | RSRSRY-RRR  | RRRRSRHNR  | RRYRRSRR-  | HSRRRRGR-- | ---RRGYSTR   |
| HSP1_THYCY  | MARYRRHSRS | RSRSRY-RRR  | RRRRSRHNR  | RRYRRSRR-  | HSRRRRGR-- | ---RRGYSTR   |
| HSP1_SMI AI | MARYRRHSRS | RSRSRY-RRR  | RRRRSRHNR  | RRYRRSRR-  | HSRRRRGR-- | ---RRGYSTR   |
| HSP1_SMI CR | MARYRRHSRS | RSRSRY-RRR  | RRRRSRHNR  | RRYRRSRR-  | HSRRRRGR-- | ---RRGYSTR   |
| HSP1_SMI DL | MARYRRHSRS | RSRSRY-RRR  | RRRRSRHNR  | RRYRRSRR-  | HSRRRRGR-- | ---RRGYSTR   |
| HSP1_ANTLA  | MARYRRHSRS | RSRSRY-RRR  | RRRRSRHNR  | RRYRRSRR-  | HSRRRRGR-- | ---RRGYSTR   |
| HSP1_PLAMS  | MARCRHRSRS | RSRSRN-QCQ  | RRRRRY-NR  | RRYRRSRR-  | HSRRRRGR-- | ---RRGCSRR   |
| HSP1_PLAIN  | MARSRRHSRS | RSRSR--NQC  | QRRRRTYNR  | RRYRRSRR-  | HSRRRRGR-- | ---RRGCSRR   |
| HSP1_PLAGI  | MARCRHRSRS | RSRSRN-QCQ  | RRRR-RHYNR | RRYRRSRR-  | HSRRRRGR-- | ---RRGCSRR   |
| HSP1_PLATE  | MARCRHRSRS | RSRSRN-QCQ  | RRRRSHYNR  | RRYRRSRR-  | HSRRRRGR-- | ---RRGCSRR   |
|             | 70         | 80          | 90         |            |            |              |
| HSP1_PERGU  | RSG-----SR | RRKRNNNTEN  | K          |            |            |              |
| HSP1_ISOMA  | RSG-----SR | RRKRNNENK-  | -          |            |            |              |
| HSP1_MONDO  | SPHRR---RR | RRRR-----   | -          |            |            |              |
| HSP1_DIDVI  | SPHRR---RR | RRRR-----   | -          |            |            |              |
| HSP1_DROGL  | RYQSR---RR | RRRRY-----  | -          |            |            |              |
| HSP1_NOTTY  | RYH-----S  | HRRRY-----  | -          |            |            |              |
| HSP1_PHACI  | RYS-----RR | --RRY-----  | -          |            |            |              |
| HSP1_HYPMS  | RYS-----RR | RRRRYY----- | -          |            |            |              |
| HSP1_LAGHI  | RYSRRRYSRR | RRRRY-----  | -          |            |            |              |
| HSP1_DENDO  | RYS-----RR | RRRRY-----  | -          |            |            |              |
| HSP1_AEPRU  | RYS-----R  | RRRRY-----  | -          |            |            |              |
| HSP1_PSECU  | RYS-----RR | RRRRY-----  | -          |            |            |              |
| HSP1_TRIVU  | RYS-----RR | GRRRY-----  | -          |            |            |              |
| HSP1_CAEFU  | RYS-----RR | RRRRY-----  | -          |            |            |              |
| HSP1_POTLO  | RYS-----R  | RRRRY-----  | -          |            |            |              |
| HSP1_LAGFA  | RYS-----RR | RRRRY-----  | -          |            |            |              |
| HSP1_BETPE  | RYS-----RR | RRRRY-----  | -          |            |            |              |
| HSP1_ONCFR  | RYS-----RR | RRRRY-----  | -          |            |            |              |
| HSP1_MACRU  | RYS-----R  | RRRRY-----  | -          |            |            |              |
| HSP1_PETCN  | RYS-----RR | RRRRY-----  | -          |            |            |              |
| HSP1_MACPA  | RYS-----RR | RRRRY-----  | -          |            |            |              |
| HSP1_MACEU  | RYS-----RR | RRRRY-----  | -          |            |            |              |
| HSP1_MACAG  | RYS-----RR | RRRRY-----  | -          |            |            |              |
| HSP1_DORVA  | RYS-----RR | RRRRY-----  | -          |            |            |              |
| HSP1_PETXA  | RYS-----RR | RRRRY-----  | -          |            |            |              |
| HSP1_THYST  | RYS-----RR | RRRRY-----  | -          |            |            |              |
| HSP1_MACGI  | RYS-----R  | RRRRY-----  | -          |            |            |              |
| HSP1_DORMU  | RYS-----RR | RRRRY-----  | -          |            |            |              |
| HSP1_WALBI  | RYS-----RR | RRRRY-----  | -          |            |            |              |
| HSP1_MACRG  | RYS-----RR | RRRRY-----  | -          |            |            |              |
| HSP1_ONYUN  | RYS-----RR | RRRRY-----  | -          |            |            |              |
| HSP1_DENGO  | RYS-----RR | RRRRY-----  | -          |            |            |              |
| HSP1_SETBR  | RYS-----RR | RRRRY-----  | -          |            |            |              |
| HSP1_DASHA  | RYS-----RR | GRRRY-----  | -          |            |            |              |
| HSP1_SARHA  | RYS-----RR | GRRRY-----  | -          |            |            |              |
| HSP1_DASMA  | RYS-----RR | GRRRY-----  | -          |            |            |              |
| HSP1_DASSP  | RYS-----RR | GRRRY-----  | -          |            |            |              |
| HSP1_NEOLO  | RYS-----RR | GRRRY-----  | -          |            |            |              |
| HSP1_DASVI  | RYS-----RR | GRRRY-----  | -          |            |            |              |
| HSP1_PHADO  | RYS-----RR | GRRRY-----  | -          |            |            |              |
| HSP1_DASAL  | RYS-----RR | GRRRY-----  | -          |            |            |              |
| HSP1_DASGE  | RYS-----RR | GRRRY-----  | -          |            |            |              |
| HSP1_DASRO  | RYS-----RR | GRRRY-----  | -          |            |            |              |
| HSP1_PSEBA  | RYS-----RR | GRRRY-----  | -          |            |            |              |
| HSP1_PARAP  | RYS-----RR | GRRRY-----  | -          |            |            |              |
| HSP1_PSENI  | RYS-----RR | GRRRY-----  | -          |            |            |              |
| HSP1_DASBY  | RYS-----RR | GRRRY-----  | -          |            |            |              |
| HSP1_MYOME  | RYS-----RR | GRRRY-----  | -          |            |            |              |
| HSP1_MYOWA  | RYS-----RR | GRRRY-----  | -          |            |            |              |
| HSP1_PSEMD  | RYS-----RR | GRRRY-----  | -          |            |            |              |
| HSP1_PSEWO  | RYS-----RR | GRRRY-----  | -          |            |            |              |
| HSP1_SMIGR  | RYS-----RR | GRRRY-----  | -          |            |            |              |
| HSP1_SMIBI  | RYS-----RR | GRRRY-----  | -          |            |            |              |
| HSP1_SMILO  | RYS-----RR | -RRRY-----  | -          |            |            |              |
| HSP1_ANTFL  | RYS-----RR | GRRRY-----  | -          |            |            |              |
| HSP1_NINTI  | RYS-----RR | GRRRY-----  | -          |            |            |              |
| HSP1_NINYV  | RYS-----RR | GRRRY-----  | -          |            |            |              |
| HSP1_PARRT  | RYS-----RR | GRRRY-----  | -          |            |            |              |
| HSP1_SMILE  | RYS-----RR | GRRRY-----  | -          |            |            |              |
| HSP1_PHATA  | RYS-----RR | GRRRY-----  | -          |            |            |              |
| HSP1_SMIPS  | RYS-----RR | GRRRY-----  | -          |            |            |              |
| HSP1_ANTBE  | RYS-----RR | GRRRY-----  | -          |            |            |              |
| HSP1_MICHA  | RYS-----RR | GRRRY-----  | -          |            |            |              |
| HSP1_ANTGO  | RYS-----RR | GRRRY-----  | -          |            |            |              |
| HSP1_ANTMI  | RYS-----RR | GRRRY-----  | -          |            |            |              |
| HSP1_ANTNA  | RYS-----RR | GRRRY-----  | -          |            |            |              |
| HSP1_ANTSW  | RYS-----RR | GRRRY-----  | -          |            |            |              |
| HSP1_MURME  | RYS-----RR | GRRRY-----  | -          |            |            |              |
| HSP1_SMIDO  | RYS-----RR | GRRRY-----  | -          |            |            |              |
| HSP1_SMIHI  | RYS-----RR | GRRRY-----  | -          |            |            |              |
| HSP1_SMIMA  | RYS-----RR | GRRRY-----  | -          |            |            |              |
| HSP1_SMIOO  | RYS-----RR | GRRRY-----  | -          |            |            |              |
| HSP1_SMIYO  | RYS-----RR | GRRRY-----  | -          |            |            |              |
| HSP1_PLAMM  | RYS-----RR | GRRRY-----  | -          |            |            |              |
| HSP1_SMIAR  | RYS-----RR | GRRRY-----  | -          |            |            |              |
| HSP1_DASCR  | RYS-----RR | GRRRY-----  | -          |            |            |              |
| HSP1_ANTLE  | RYS-----RR | GRRRY-----  | -          |            |            |              |
| HSP1_ANTST  | RYS-----RR | GRRRY-----  | -          |            |            |              |
| HSP1_MURLO  | RYS-----RR | GRRRY-----  | -          |            |            |              |
| HSP1_MYRFA  | RYS-----RR | GRRRY-----  | -          |            |            |              |
| HSP1_NINRI  | RYS-----RR | GRRRY-----  | -          |            |            |              |
| HSP1_SMIGA  | RYS-----RR | GRRRY-----  | -          |            |            |              |
| HSP1_SMIGI  | RYS-----RR | GRRRY-----  | -          |            |            |              |
| HSP1_PHACL  | RYS-----RR | GRRRY-----  | -          |            |            |              |
| HSP1_SMI MU | RYS-----RR | GRRRY-----  | -          |            |            |              |
| HSP1_SMI VI | RYS-----RR | GRRRY-----  | -          |            |            |              |
| HSP1_THYCY  | RYS-----RR | GRRRY-----  | -          |            |            |              |
| HSP1_SMI AI | RYS-----RR | GRRRY-----  | -          |            |            |              |
| HSP1_SMI CR | RYS-----RR | GRRRY-----  | -          |            |            |              |
| HSP1_SMI DL | RYS-----RR | GRRRY-----  | -          |            |            |              |
| HSP1_ANTLA  | RYS-----RR | GRRRY-----  | -          |            |            |              |
| HSP1_PLAMS  | RCS-----RR | RRRRRC----- | -          |            |            |              |
| HSP1_PLAIN  | RCS-----RR | RRRRRC----- | -          |            |            |              |
| HSP1_PLAGI  | RCS-----RR | RRRRRC----- | -          |            |            |              |
| HSP1_PLATE  | RCS-----RR | RRRRRC----- | -          |            |            |              |

Supplemental Figure 4. Alignment of Metatherian P1 type sperm protamines.
